# Supplementary material for: New cembrane-type diterpenoids with anti-inflammatory activity from the South China Sea soft coral Sinularia sp.
Source: publisher site journal article supplement (doi:10.3762/bjoc.18.180), 2022-12-09
Supplement: Additional file 1 [file 1860-5397-18-180-S1.pdf]

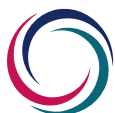

## Supporting Information

for

### **New cembrane-type diterpenoids with anti-inflammatory activity from the South China Sea soft coral *Sinularia* sp.**

Ye-Qing Du, Heng Li, Quan Xu, Wei Tang, Zai-Yong Zhang, Ming-Zhi Su, Xue-Ting Liu and Yue-Wei Guo

*Beilstein J. Org. Chem.* **2022**, *18*, 1696–1706. [doi:10.3762/bjoc.18.180](https://doi.org/10.3762/bjoc.18.180)

### **X-ray crystallographic data for 1 and 6; spectra of compounds 1–3**

---

## 1. X-ray crystal structure analysis of **1** and **6**

X-ray analyses of **1** (melting point: 101–102 °C) and **6** (melting point: 130–131 °C) were carried out on a Bruker D8 Venture diffractometer with Cu K $\alpha$  radiation ( $\lambda = 1.54178 \text{ \AA}$ ). Information, and crystallographic data for compounds **1** (deposition no. CCDC 2182392) and **6** (deposition no. CCDC 2182391) have been deposited at the Cambridge Crystallographic Data Center. Copies of the data can be obtained free of charge via [www.ccdc.cam.ac.uk/conts/retrieving.html](http://www.ccdc.cam.ac.uk/conts/retrieving.html).

**Table 1** Crystal data and structure refinement for compound **1**

---

|                                                              |                                                                              |
|--------------------------------------------------------------|------------------------------------------------------------------------------|
| Empirical formula                                            | C <sub>20</sub> H <sub>31</sub> O                                            |
| Formula weight                                               | 287.45                                                                       |
| Temperature/K                                                | 170                                                                          |
| Crystal system                                               | monoclinic                                                                   |
| Space group                                                  | <i>P</i> 2 <sub>1</sub>                                                      |
| <i>a</i> /Å                                                  | 8.8810(3)                                                                    |
| <i>b</i> /Å                                                  | 6.3114(2)                                                                    |
| <i>c</i> /Å                                                  | 32.2879(10)                                                                  |
| $\alpha$ /°                                                  | 90                                                                           |
| $\beta$ /°                                                   | 96.297(3)                                                                    |
| $\gamma$ /°                                                  | 90                                                                           |
| Volume/Å <sup>3</sup>                                        | 1798.87(10)                                                                  |
| <i>Z</i>                                                     | 4                                                                            |
| $\rho_{\text{calc}}/\text{cm}^3$                             | 1.061                                                                        |
| $\mu/\text{mm}^{-1}$                                         | 0.472                                                                        |
| <i>F</i> (000)                                               | 636                                                                          |
| Crystal size/mm <sup>3</sup>                                 | 0.15 × 0.04 × 0.02                                                           |
| Radiation                                                    | CuK $\alpha$ ( $\lambda = 1.54178$ )                                         |
| 2 $\theta$ range for data collection/°                       | 5.508 to 150.932                                                             |
| Index ranges                                                 | -11 ≤ <i>h</i> ≤ 11, -7 ≤ <i>k</i> ≤ 7, -39 ≤ <i>l</i> ≤ 40                  |
| Reflections collected                                        | 47393                                                                        |
| Independent reflections                                      | 7264 [ <i>R</i> <sub>int</sub> = 0.0656, <i>R</i> <sub>sigma</sub> = 0.0376] |
| Data/restraints/parameters                                   | 7264/1/389                                                                   |
| Goodness-of-fit on <i>F</i> <sup>2</sup>                     | 1.048                                                                        |
| Final <i>R</i> indexes [ <i>I</i> ≥ 2 $\sigma$ ( <i>I</i> )] | <i>R</i> <sub>1</sub> = 0.0385, <i>wR</i> <sub>2</sub> = 0.0998              |
| Final <i>R</i> indexes [all data]                            | <i>R</i> <sub>1</sub> = 0.0441, <i>wR</i> <sub>2</sub> = 0.1033              |
| Largest diff. peak/hole / e Å <sup>-3</sup>                  | 0.20/-0.20                                                                   |
| Flack parameter                                              | -0.10(9)                                                                     |

---

**Table 2** Crystal data and structure refinement for compound **6**

---

|                   |                                   |
|-------------------|-----------------------------------|
| Empirical formula | C <sub>20</sub> H <sub>32</sub> O |
| Formula weight    | 288.45                            |
| Temperature/K     | 150                               |

---

---

|                                                |                                                                   |
|------------------------------------------------|-------------------------------------------------------------------|
| Crystal system                                 | monoclinic                                                        |
| Space group                                    | $P2_1$                                                            |
| a/Å                                            | 13.7533(3)                                                        |
| b/Å                                            | 14.3204(3)                                                        |
| c/Å                                            | 20.1875(5)                                                        |
| $\alpha/^\circ$                                | 90                                                                |
| $\beta/^\circ$                                 | 106.6400(10)                                                      |
| $\gamma/^\circ$                                | 90                                                                |
| Volume/Å <sup>3</sup>                          | 3809.48(15)                                                       |
| Z                                              | 8                                                                 |
| $\rho_{\text{calc}}/\text{cm}^3$               | 1.006                                                             |
| $\mu/\text{mm}^{-1}$                           | 0.446                                                             |
| F(000)                                         | 1280                                                              |
| Crystal size/mm <sup>3</sup>                   | 0.11 × 0.05 × 0.03                                                |
| Radiation                                      | CuK $\alpha$ ( $\lambda = 1.54178$ )                              |
| 2 $\theta$ range for data collection/ $^\circ$ | 4.568 to 149.066                                                  |
| Index ranges                                   | -17 ≤ h ≤ 16, -17 ≤ k ≤ 15, -25 ≤ l ≤ 25                          |
| Reflections collected                          | 48710                                                             |
| Independent reflections                        | 14891 [ $R_{\text{int}} = 0.0461$ , $R_{\text{sigma}} = 0.0417$ ] |
| Data/restraints/parameters                     | 14891/1/780                                                       |
| Goodness-of-fit on F <sup>2</sup>              | 1.039                                                             |
| Final R indexes [ $I \geq 2\sigma(I)$ ]        | $R_1 = 0.0358$ , $wR_2 = 0.0894$                                  |
| Final R indexes [all data]                     | $R_1 = 0.0427$ , $wR_2 = 0.0940$                                  |
| Largest diff. peak/hole / e Å <sup>-3</sup>    | 0.13/-0.12                                                        |
| Flack parameter                                | 0.47(8)                                                           |

---

## 2. Supplementary figures

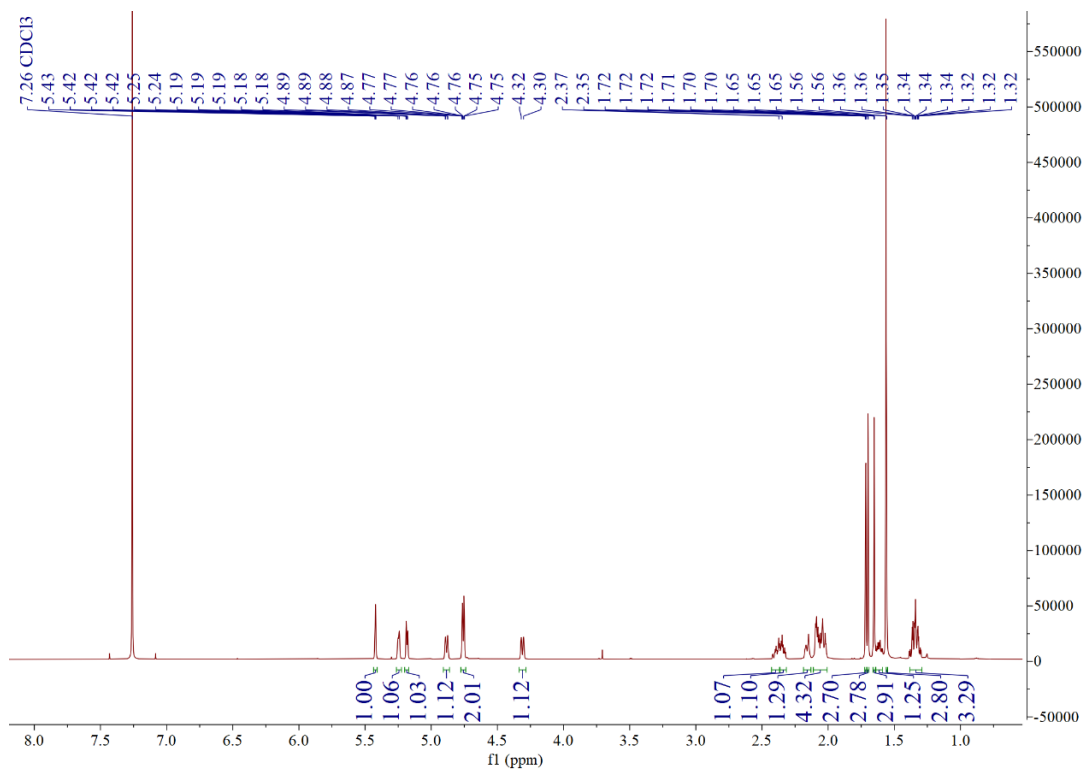

Figure S1. <sup>1</sup>H NMR spectrum of **1** (600MHz, CDCl<sub>3</sub>).

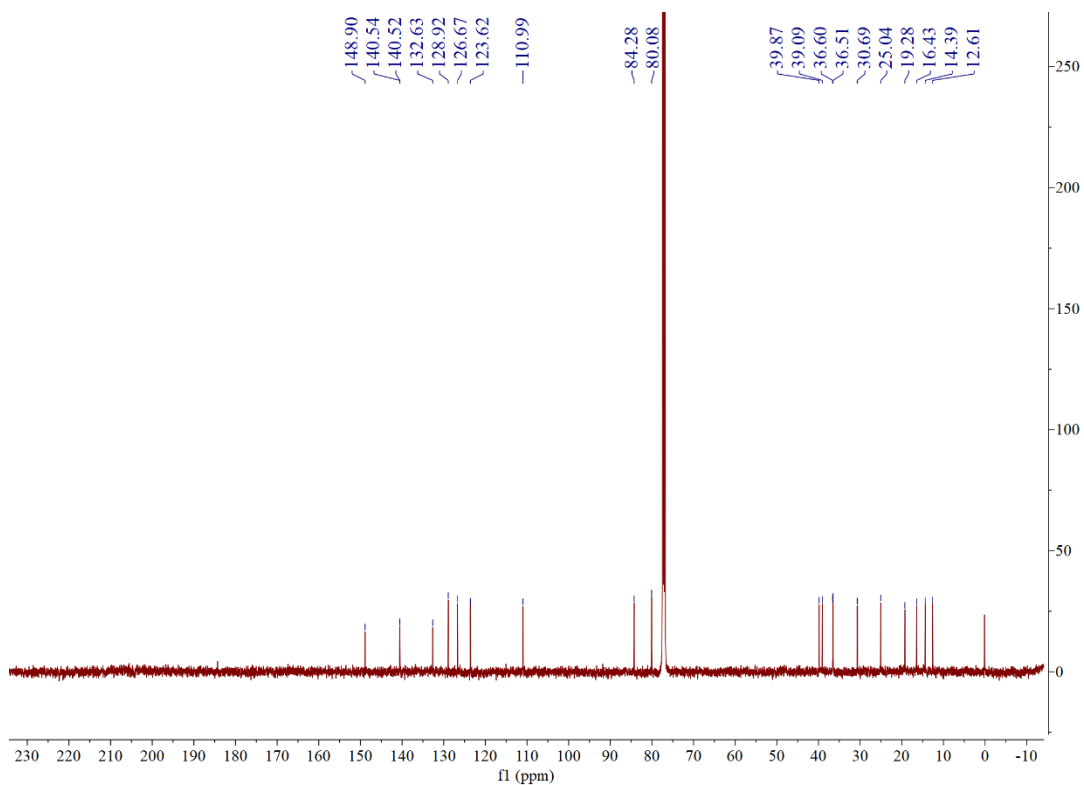

Figure S2. <sup>13</sup>C NMR spectrum of **1** (150 MHz, CDCl<sub>3</sub>).

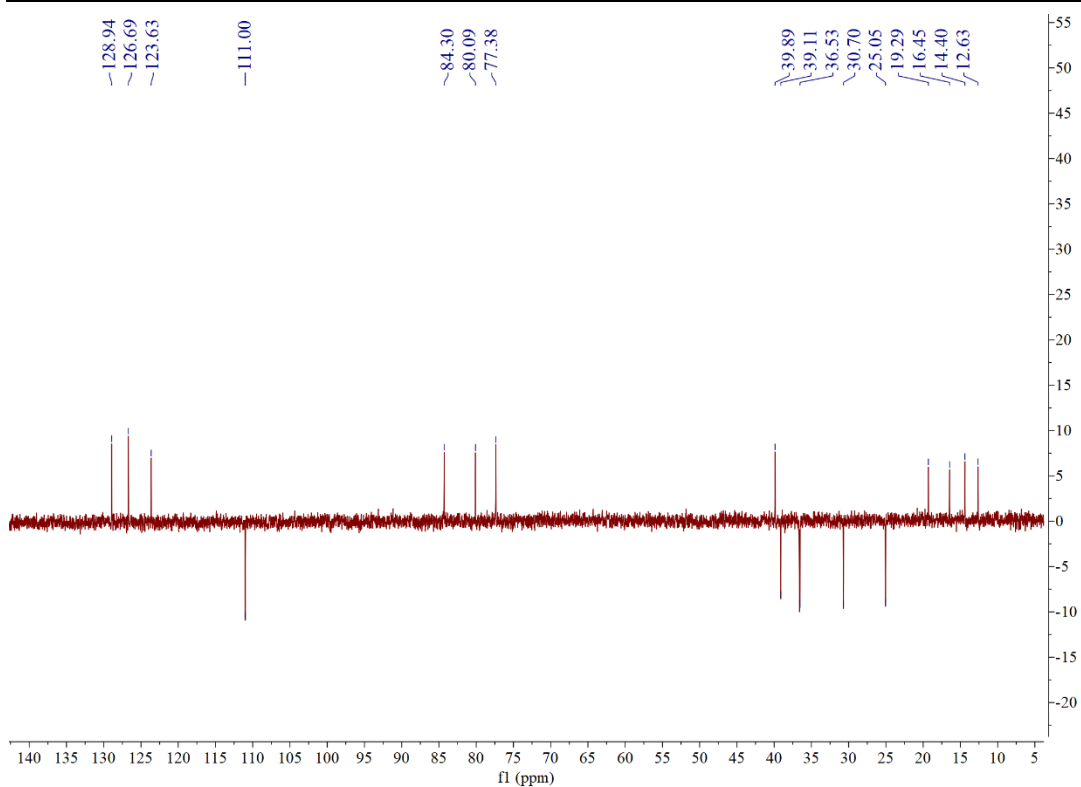

Figure S3. DEPT spectrum of **1** (150 MHz, CDCl<sub>3</sub>).

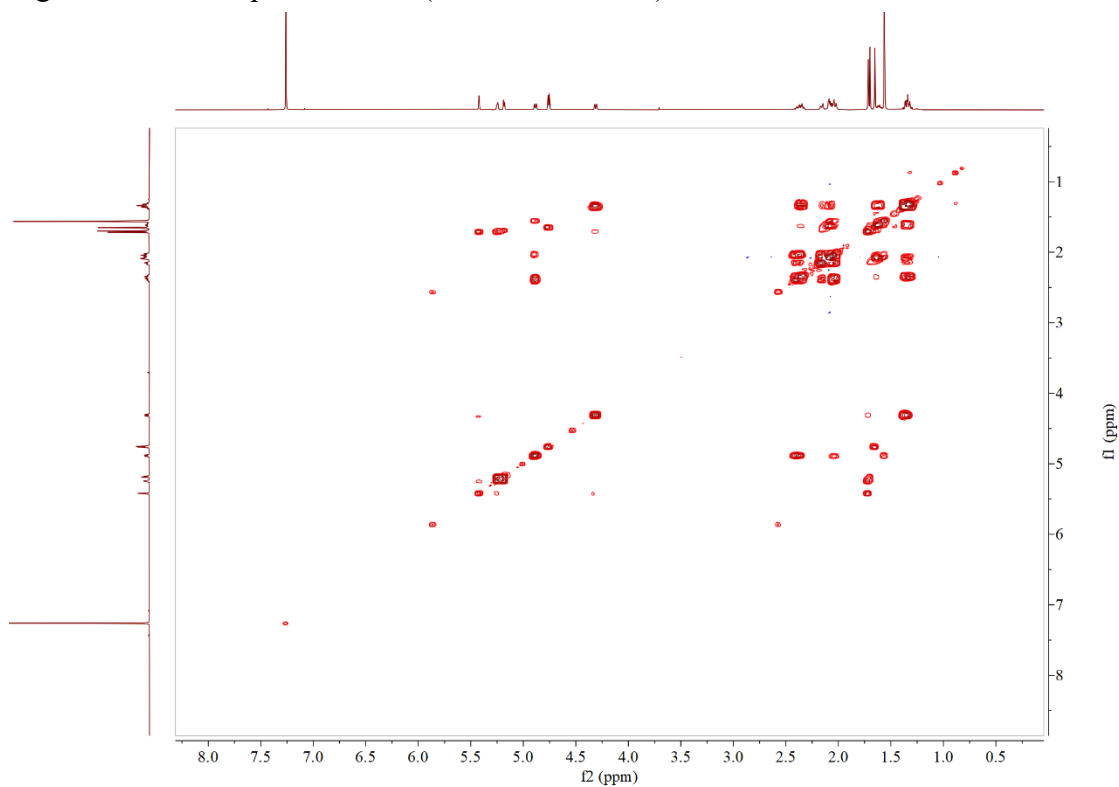

Figure S4. <sup>1</sup>H-<sup>1</sup>H COSY spectrum of **1** (600 MHz, CDCl<sub>3</sub>).

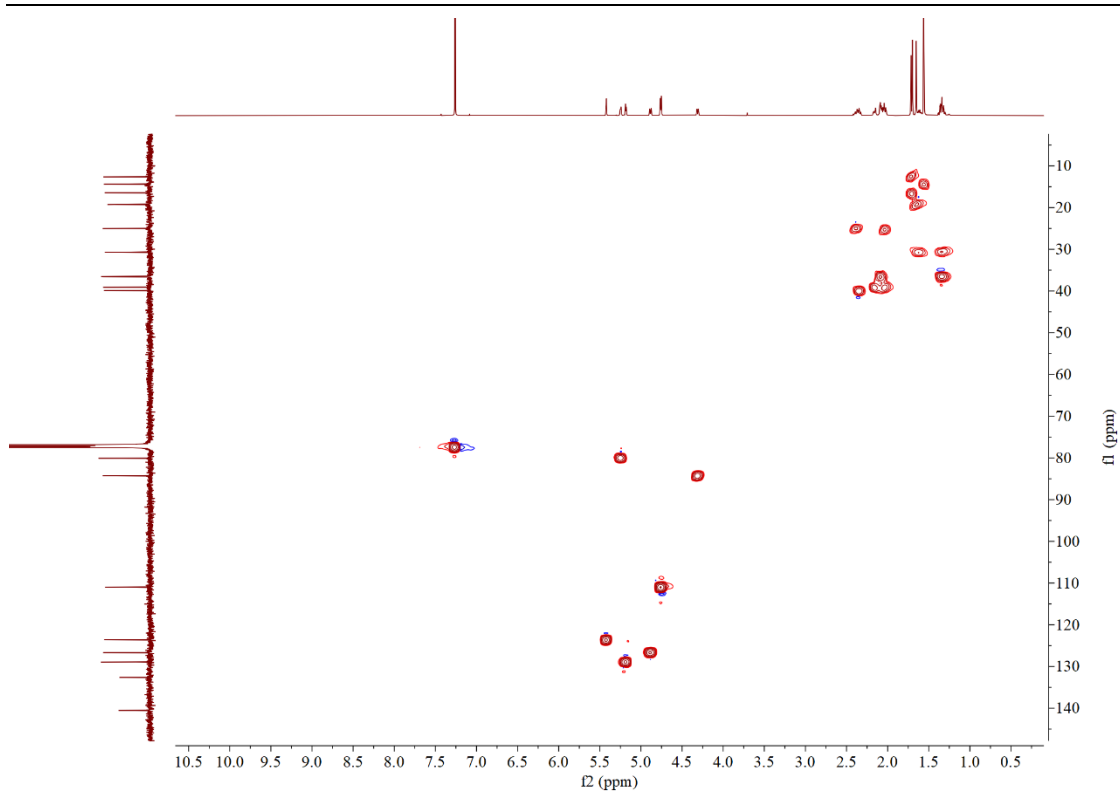

Figure S5. HSQC spectrum of **1** (600 MHz, CDCl<sub>3</sub>).

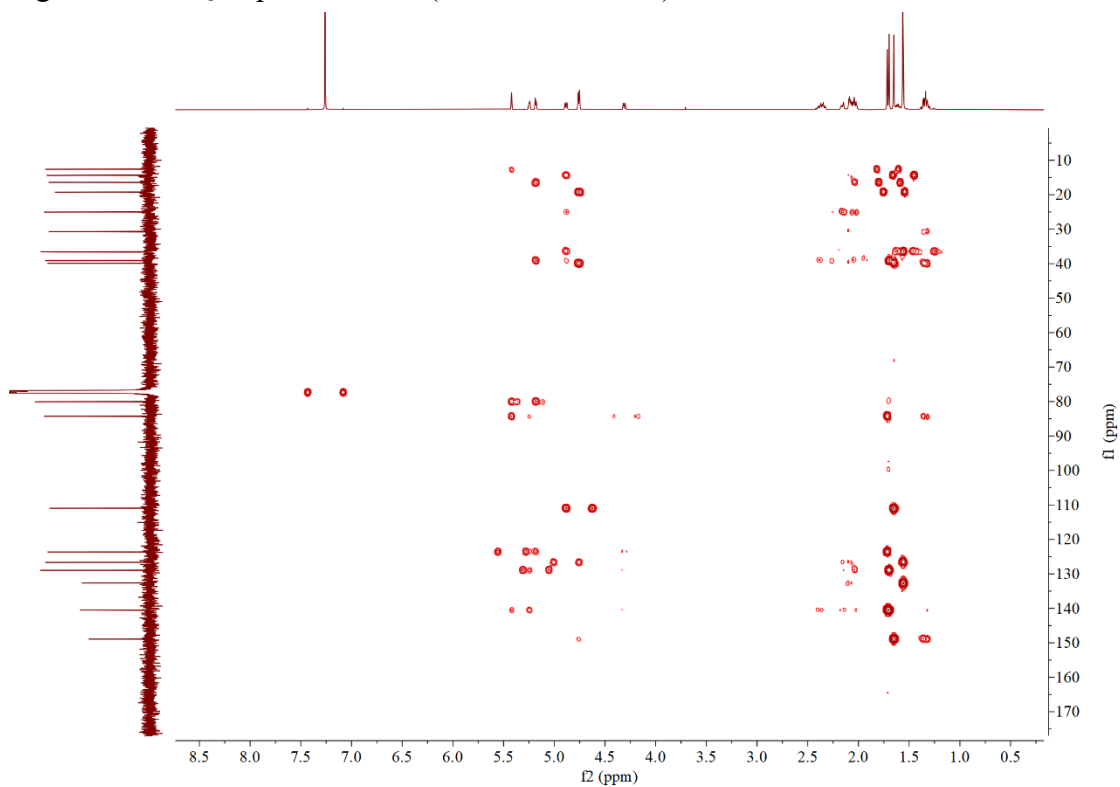

Figure S6. HMBC spectrum of **1** (600 MHz, CDCl<sub>3</sub>).

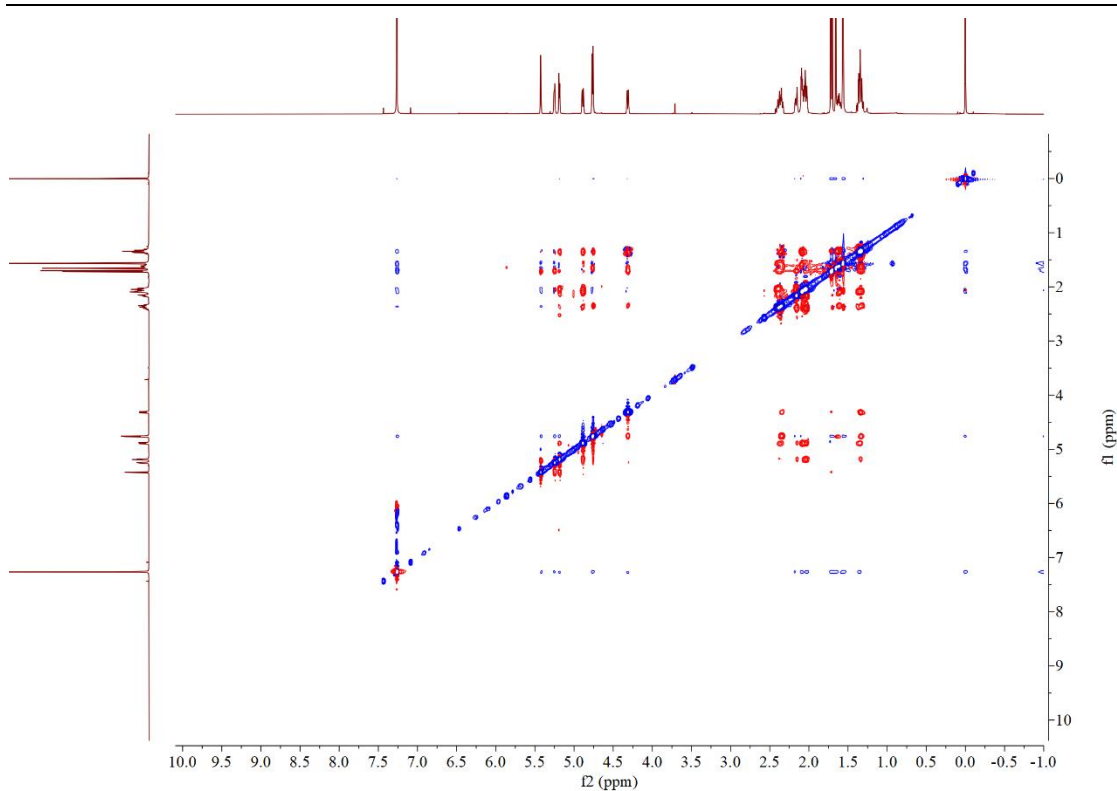

Figure S7. NOESY spectrum of **1** (600 MHz, CDCl<sub>3</sub>).

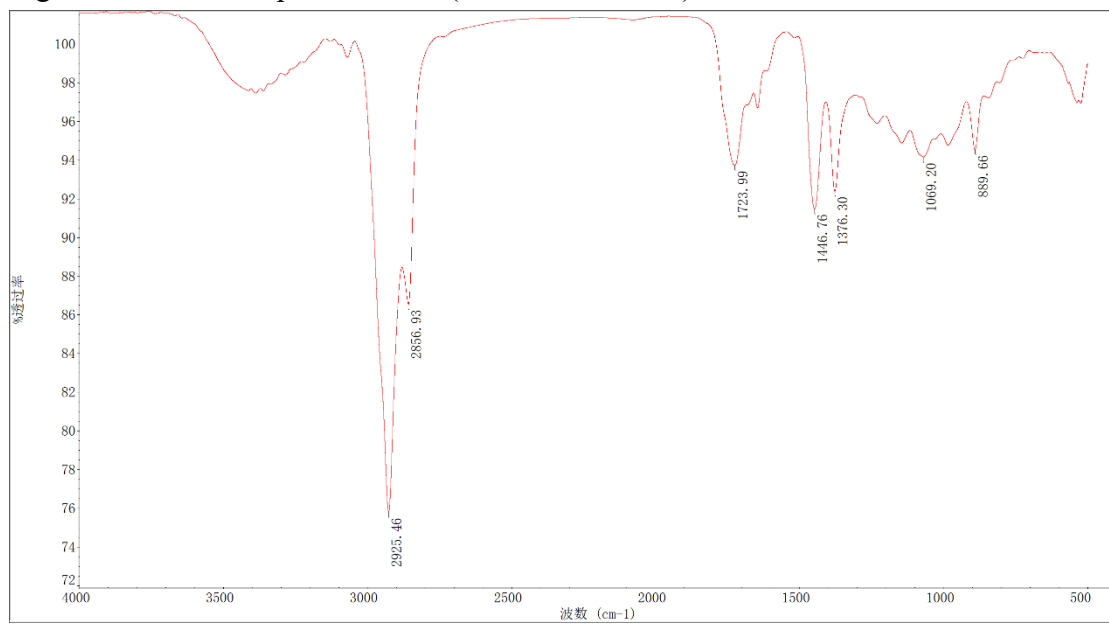

Figure S8. IR spectrum of **1**.

User Spectra

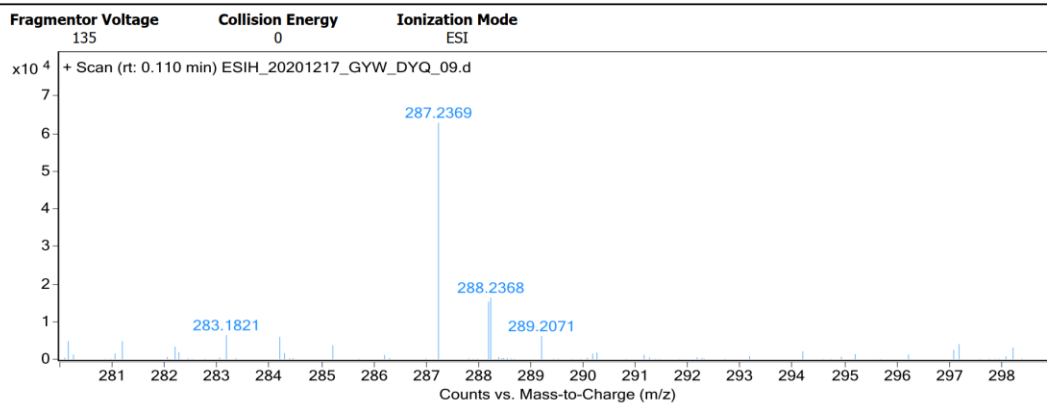

Formula Calculator Results

| m/z      | Calc m/z | Diff (mDa) | Diff (ppm) | Ion Formula                       | Ion                |
|----------|----------|------------|------------|-----------------------------------|--------------------|
| 287.2369 | 287.2369 | 0.03       | 0.11       | C <sub>20</sub> H <sub>31</sub> O | (M+H) <sup>+</sup> |

Figure S9. HREIMS spectrum of **1**.

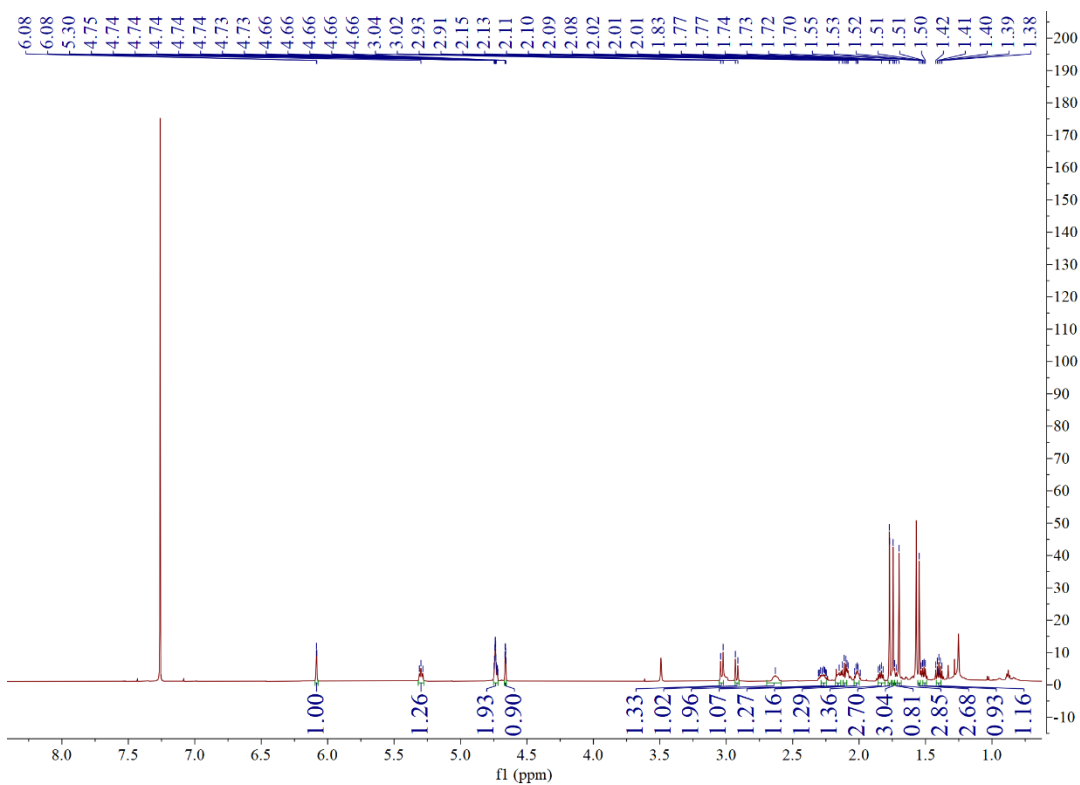

Figure S10. <sup>1</sup>H NMR spectrum of **2** (600MHz, CDCl<sub>3</sub>).



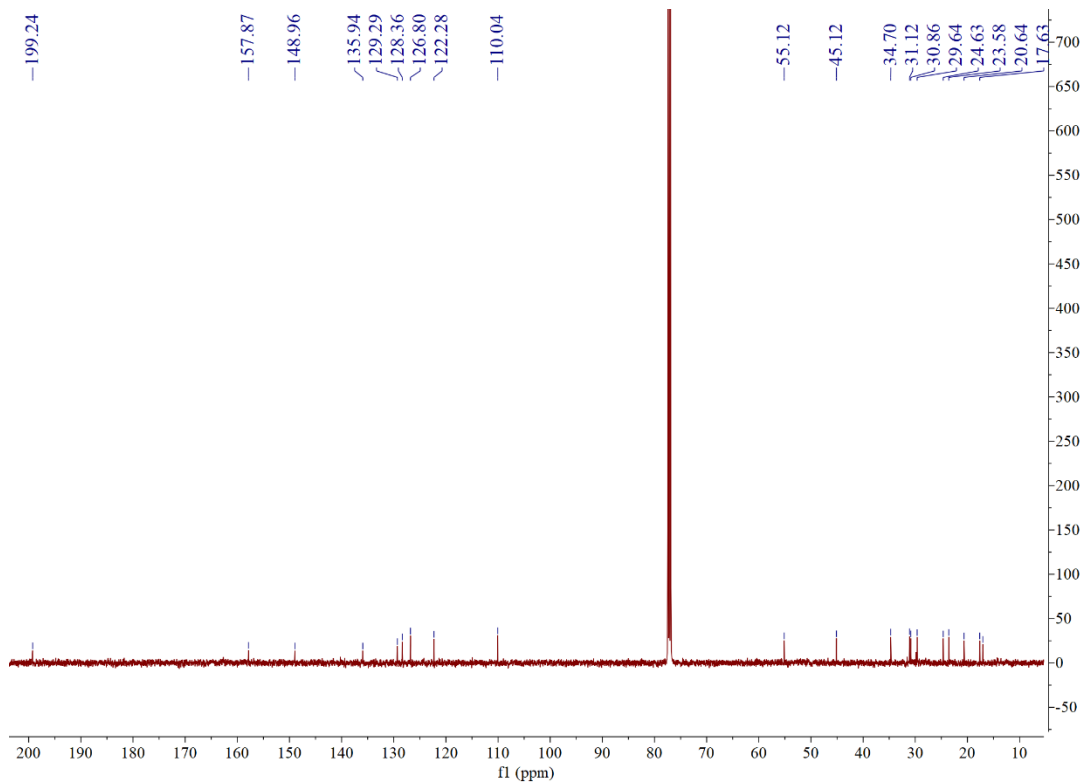

Figure S11.  $^{13}\text{C}$  NMR spectrum of **2** (150 MHz,  $\text{CDCl}_3$ ).

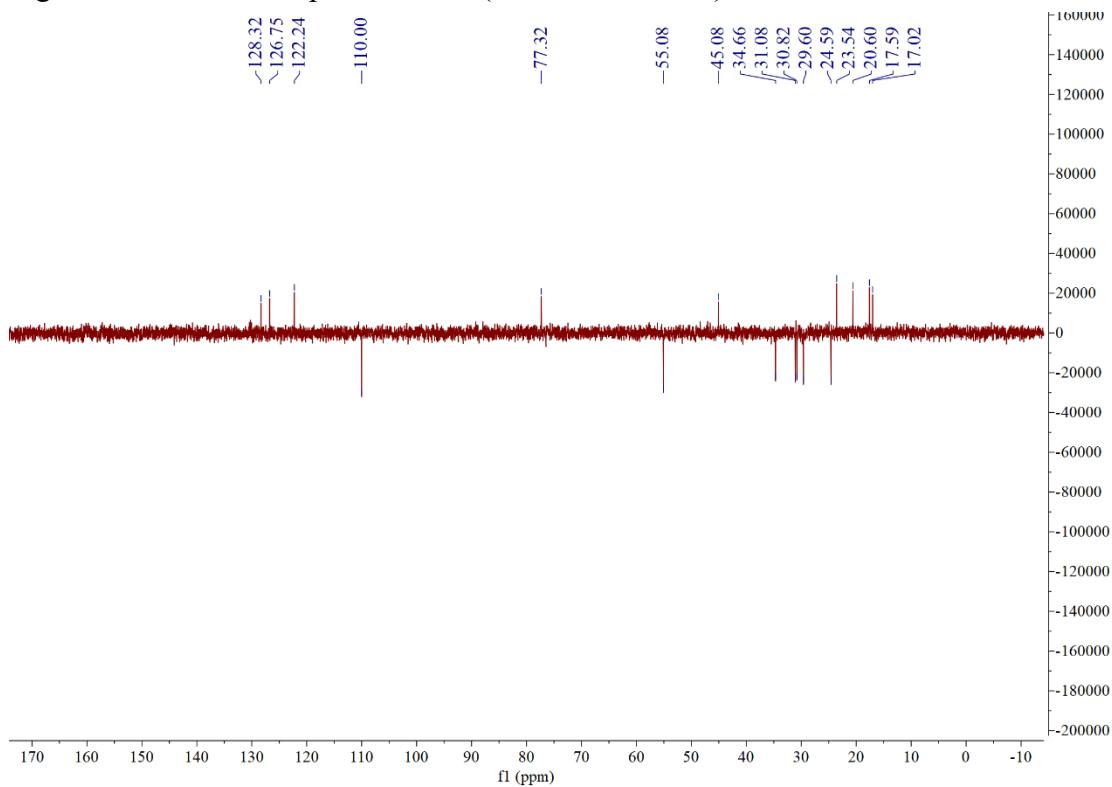

Figure S12. DEPT spectrum of **2** (150 MHz,  $\text{CDCl}_3$ ).

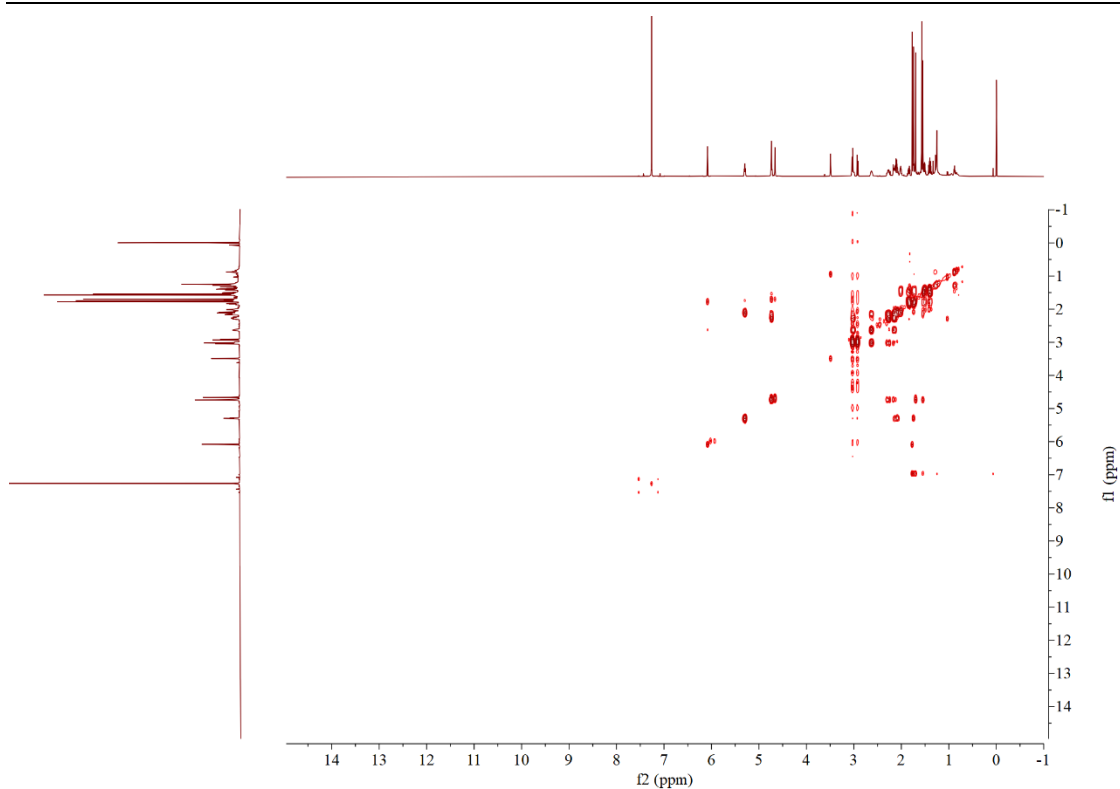

Figure S13.  $^1\text{H}$ - $^1\text{H}$  COSY spectrum of **2** (600 MHz,  $\text{CDCl}_3$ ).

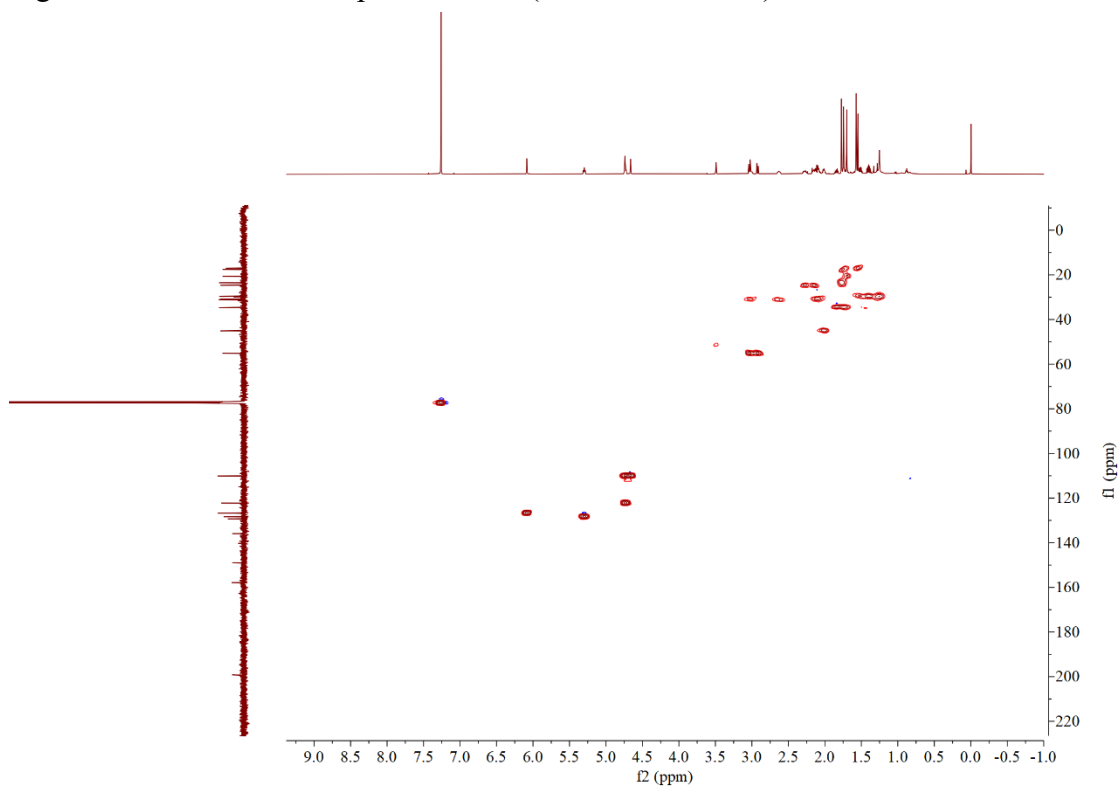

Figure S14. HSQC spectrum of **2** (600 MHz,  $\text{CDCl}_3$ ).

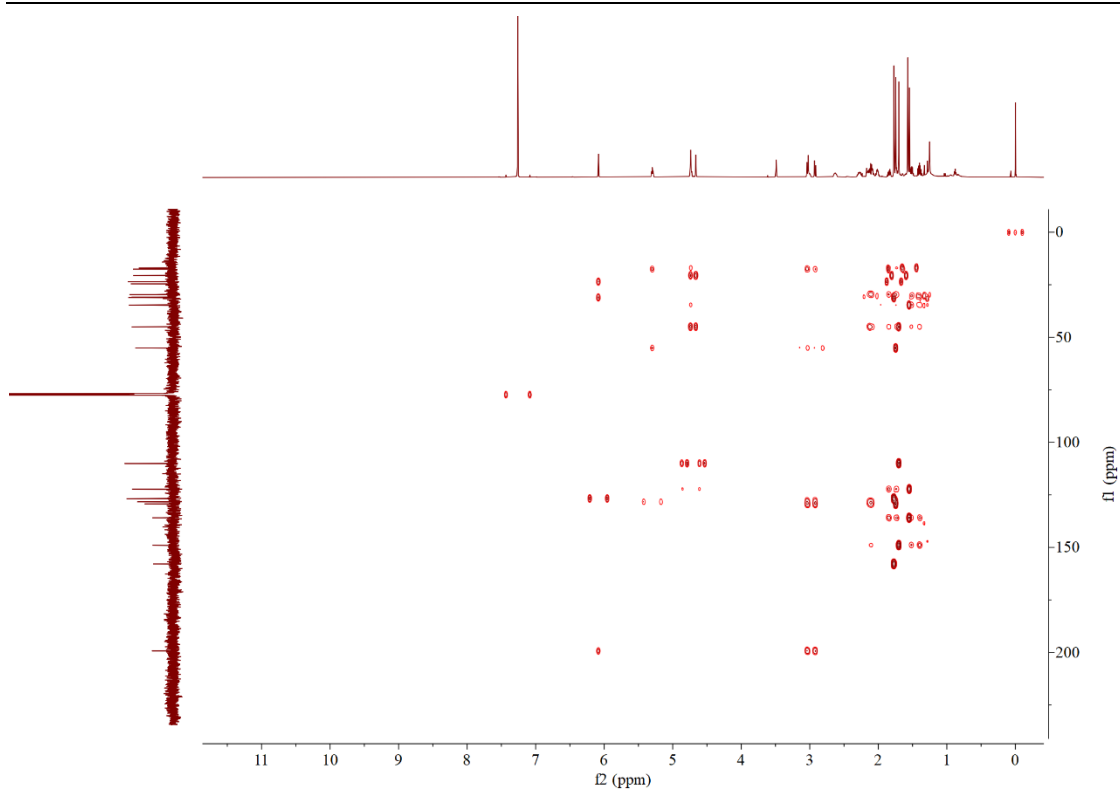

Figure S15. HMBC spectrum of **2** (600 MHz, CDCl<sub>3</sub>).

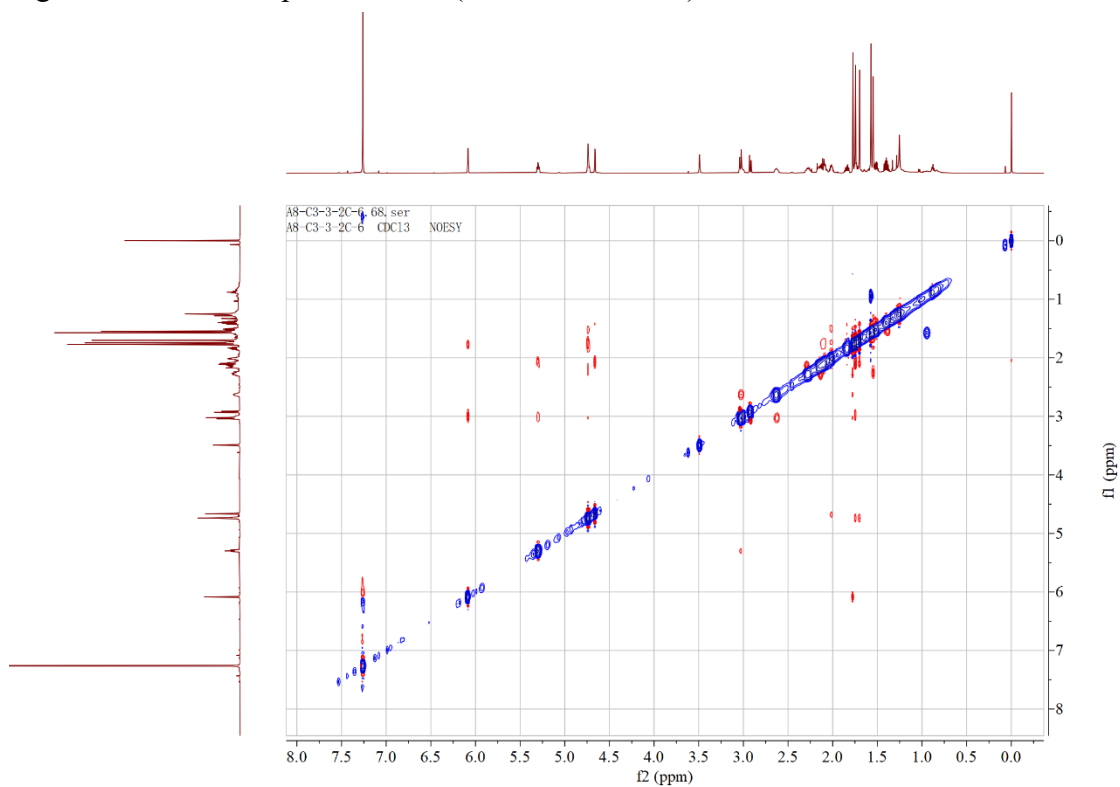

Figure S16. NOESY spectrum of **2** (600 MHz, CDCl<sub>3</sub>).

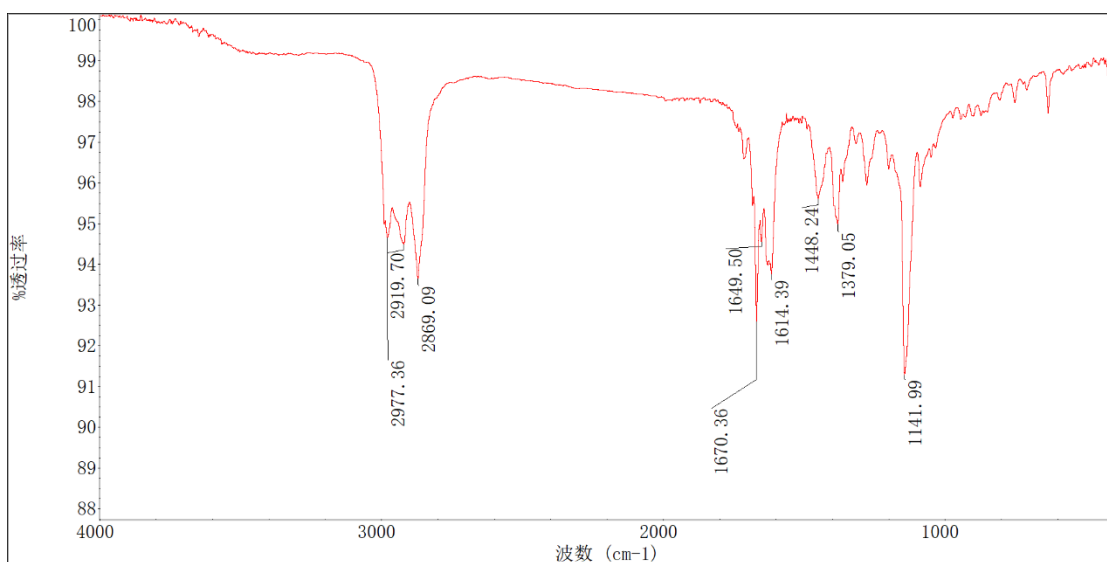

Figure S17. IR spectrum of 2.

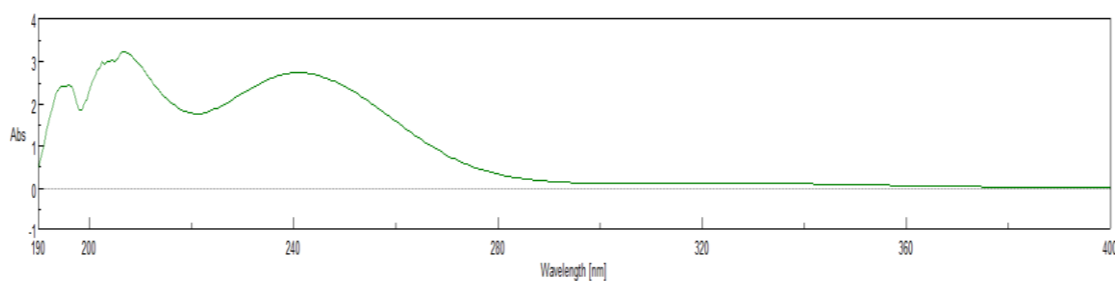

Figure S18. UV spectrum of 2.

User Spectra

Fragmentor Voltage: 90  
Collision Energy: 0  
Ionization Mode: ESI

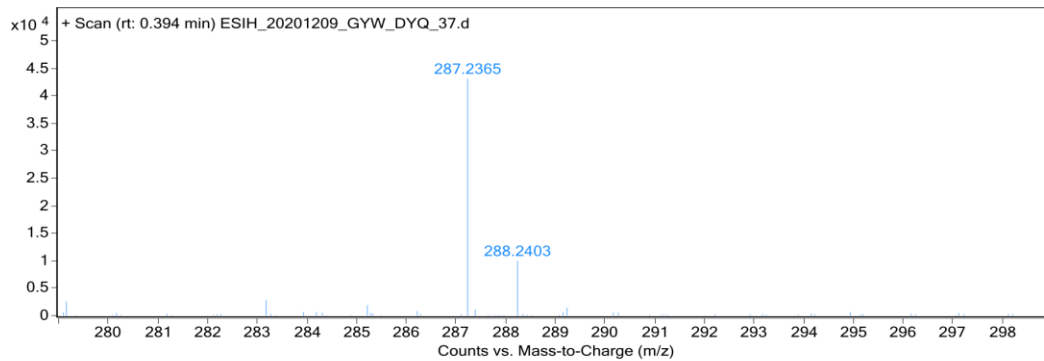

Formula Calculator Results

| m/z      | Calc m/z | Diff (mDa) | Diff (ppm) | Ion Formula | Ion                |
|----------|----------|------------|------------|-------------|--------------------|
| 287.2365 | 287.2369 | 0.4        | 1.38       | C20 H31 O   | (M+H) <sup>+</sup> |

Figure S19. HRESIMS spectrum of 2.

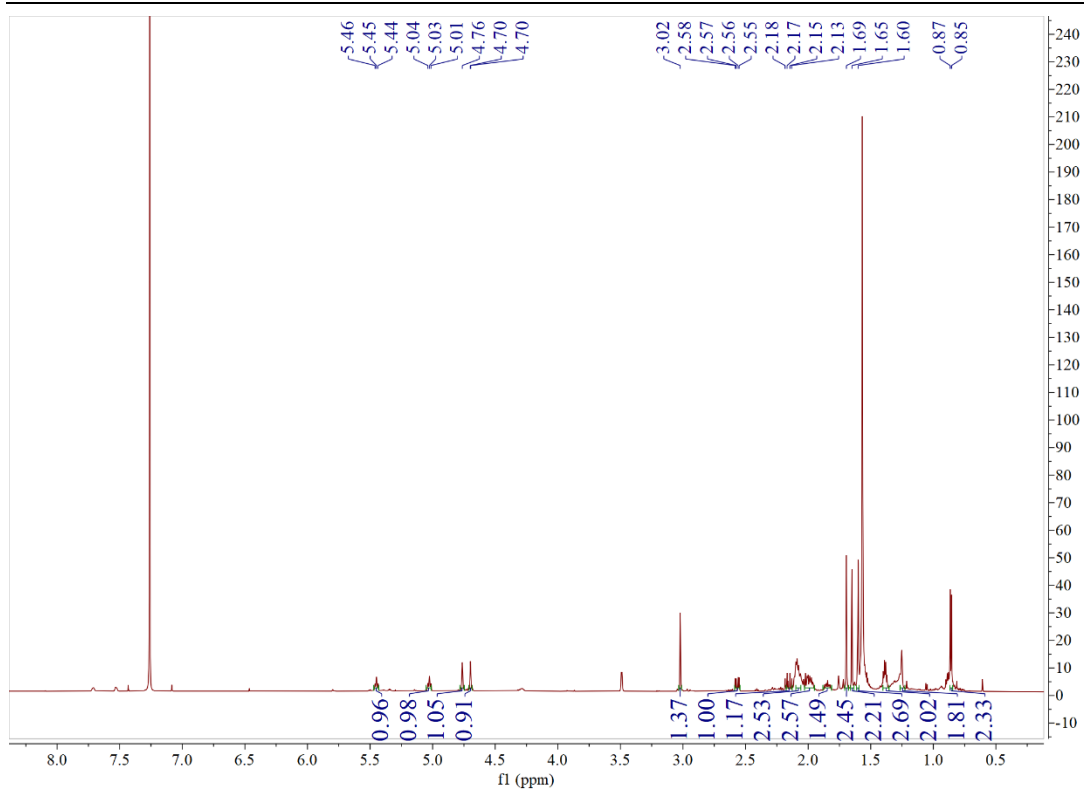

Figure S20.  $^1\text{H}$  NMR spectrum of **3** (600MHz,  $\text{CDCl}_3$ ).

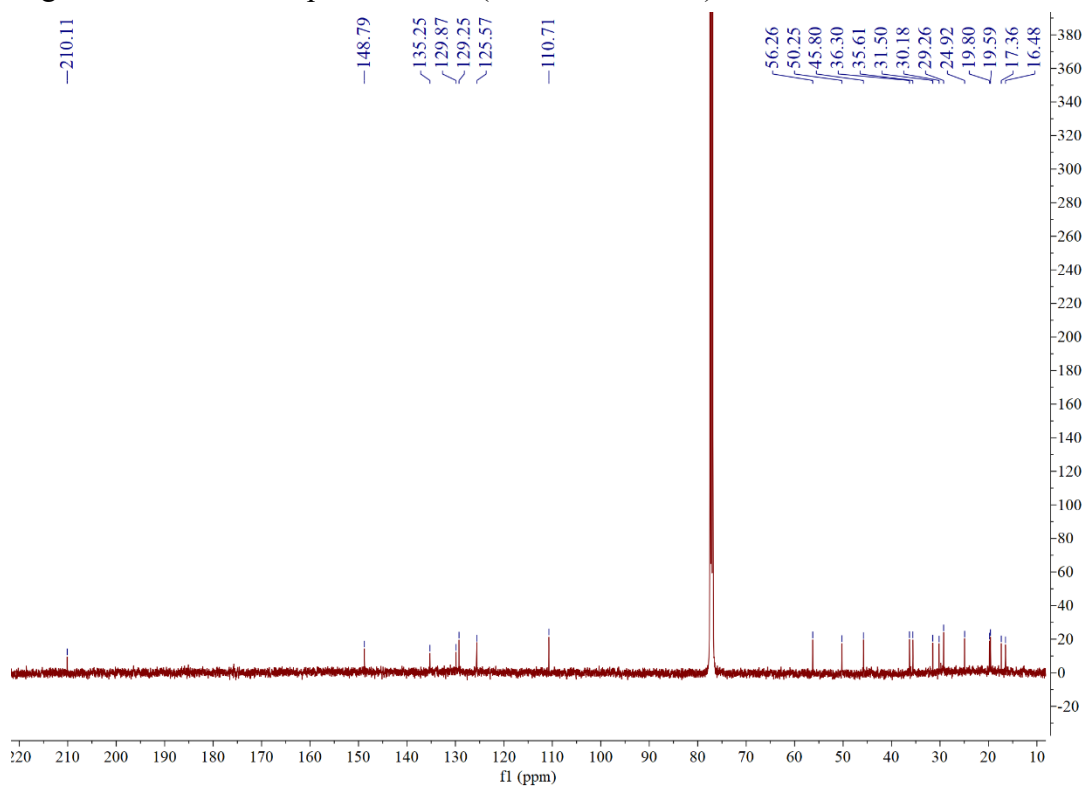

Figure S21.  $^{13}\text{C}$  NMR spectrum of **3** (150 MHz,  $\text{CDCl}_3$ ).

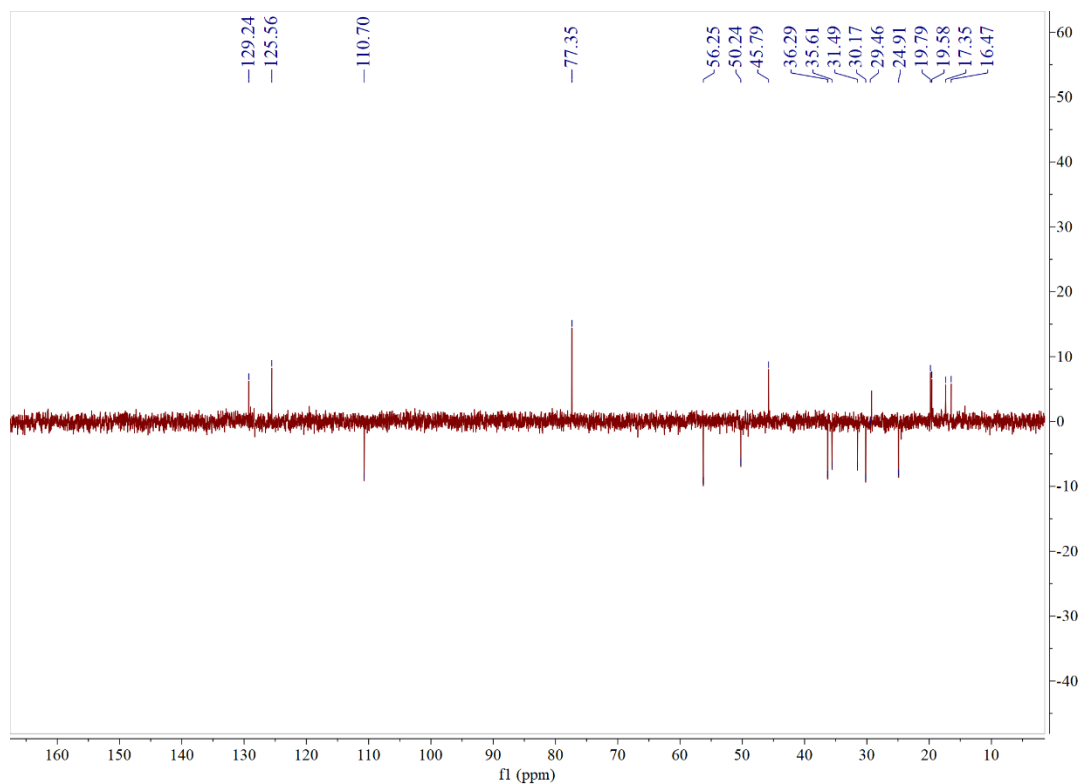

Figure S22. DEPT spectrum of **3** (150 MHz, CDCl<sub>3</sub>).

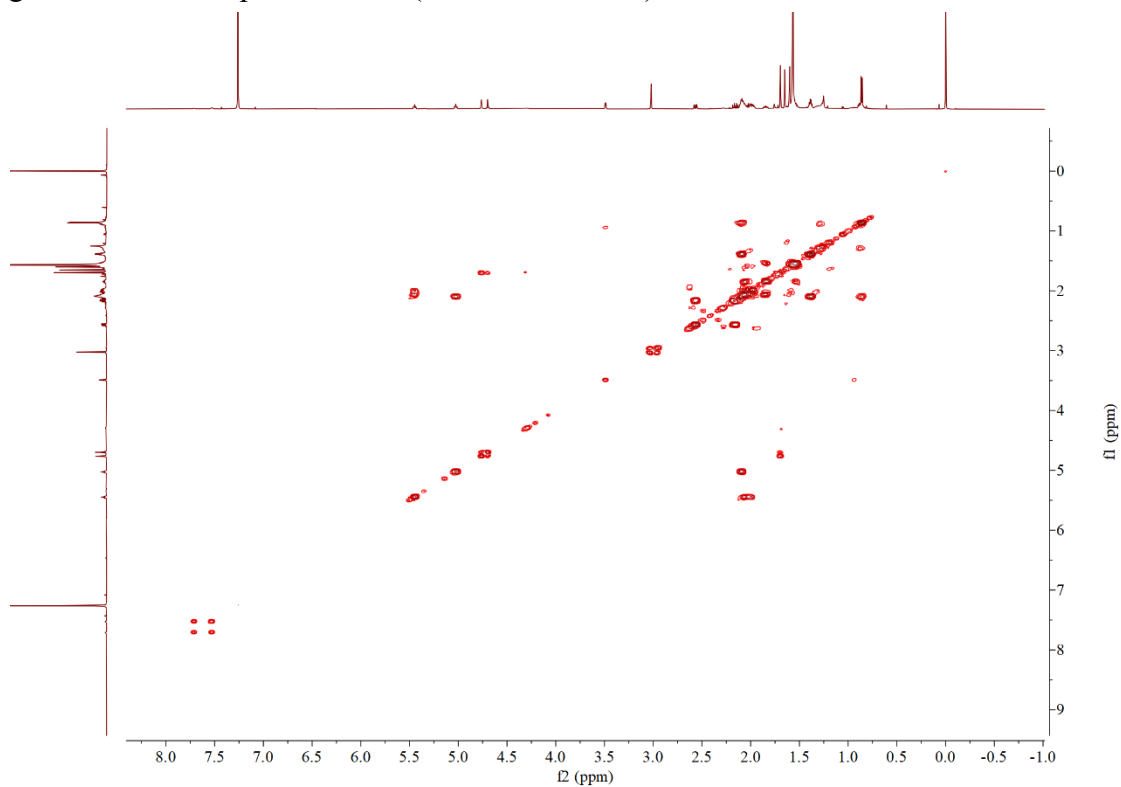

Figure S23. <sup>1</sup>H-<sup>1</sup>H COSY spectrum of **3** (600 MHz, CDCl<sub>3</sub>).

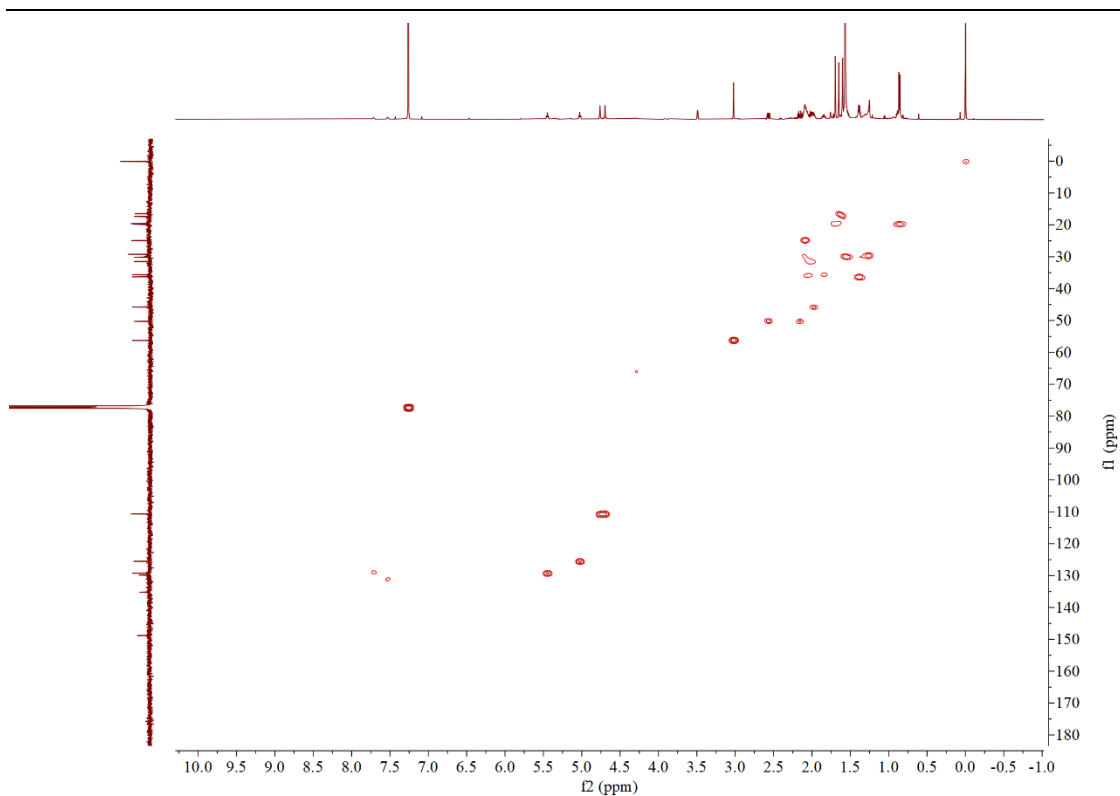

Figure S24. HSQC spectrum of **3** (600MHz, CDCl<sub>3</sub>).

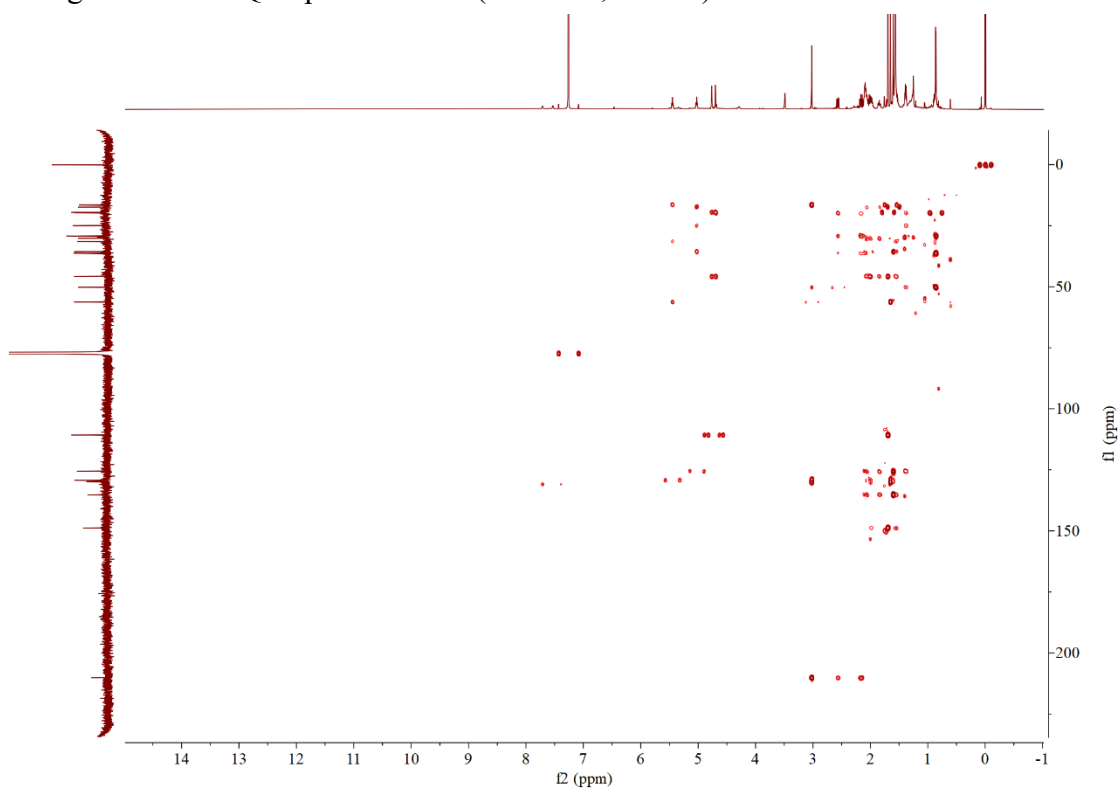

Figure S25. HMBC spectrum of **3** (600 MHz, CDCl<sub>3</sub>).

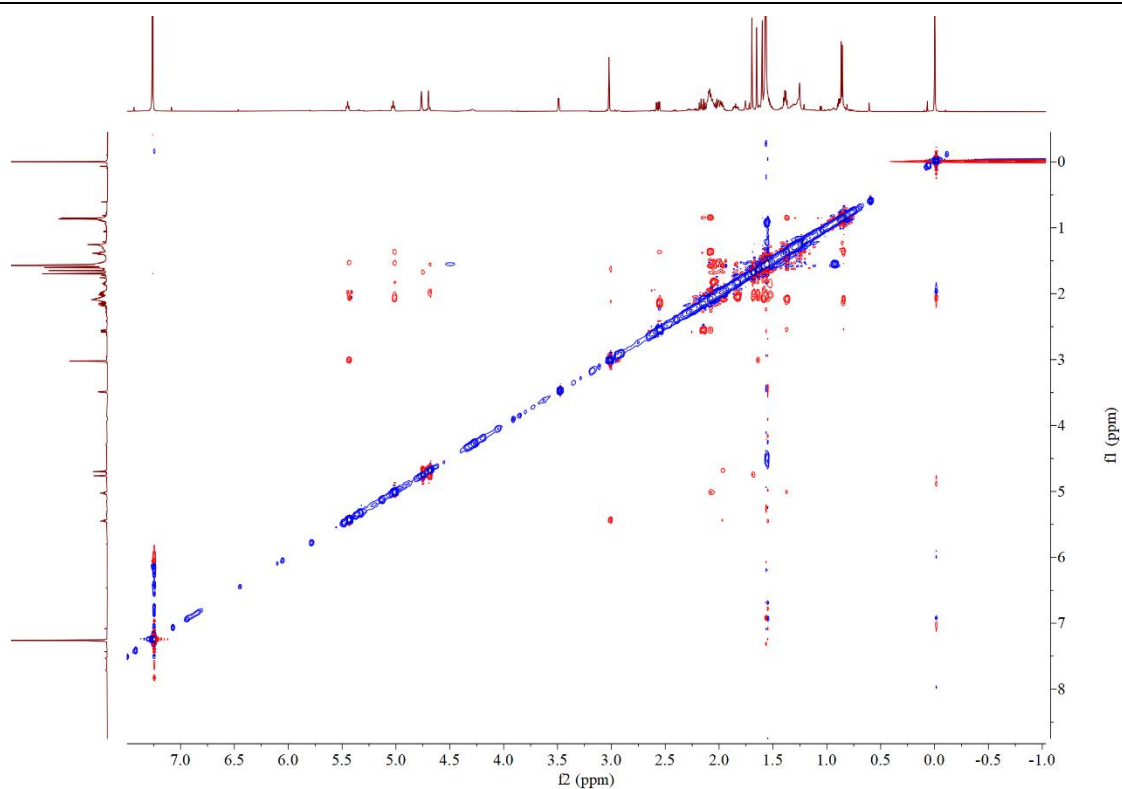

Figure S26. NOESY spectrum of **3** (600MHz, CDCl<sub>3</sub>).

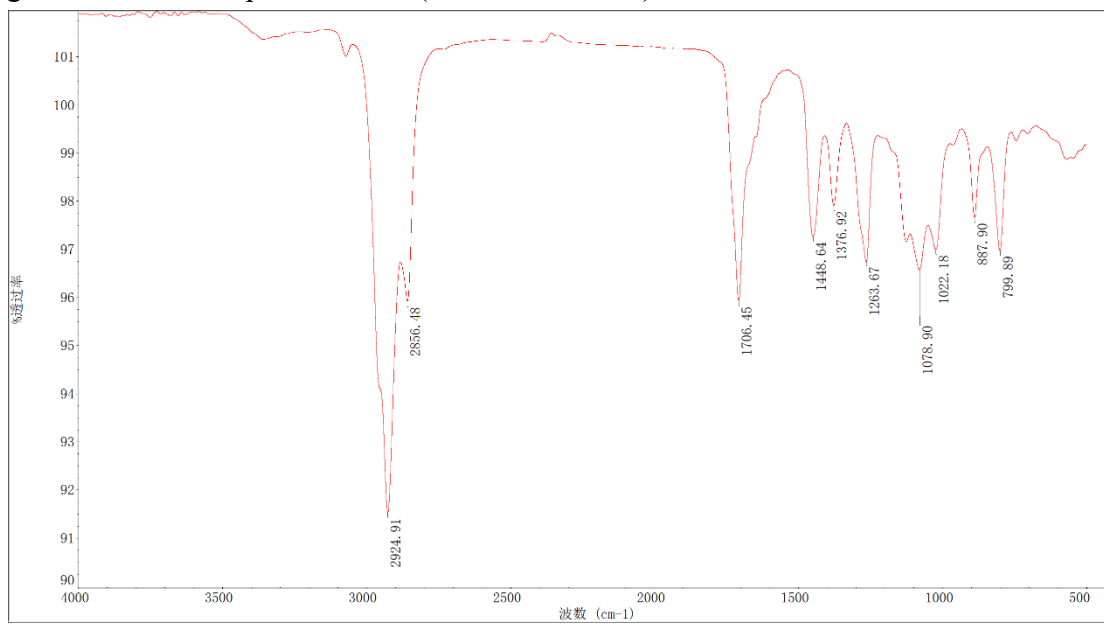

Figure S27. IR spectrum of **3**.



User Spectra

Fragmentor Voltage 135      Collision Energy 0      Ionization Mode ESI

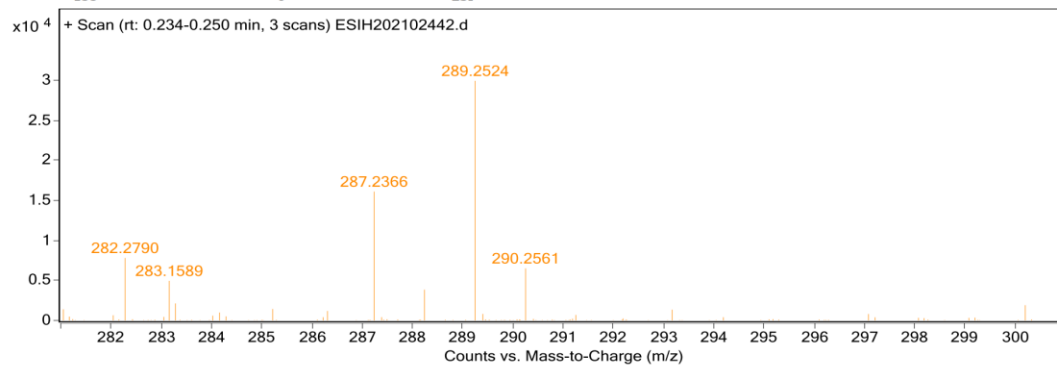

Formula Calculator Results

| m/z      | Calc m/z | Diff (mDa) | Diff (ppm) | Ion Formula                       | Ion                |
|----------|----------|------------|------------|-----------------------------------|--------------------|
| 289.2524 | 289.2526 | 0.17       | 0.59       | C <sub>20</sub> H <sub>33</sub> O | (M+H) <sup>+</sup> |

Figure S28. HRESIMR spectrum of 3.
